# Supplementary material for: A new branched proximity hybridization assay for the quantification of nanoscale protein–protein proximity
Source: PubMed Central journal article supplement (PMC6905527; doi:10.1371/journal.pbio.3000569), 2019-12-11
Supplement: pbio.3000569.s009.pdf [file pbio.3000569.s009.pdf]

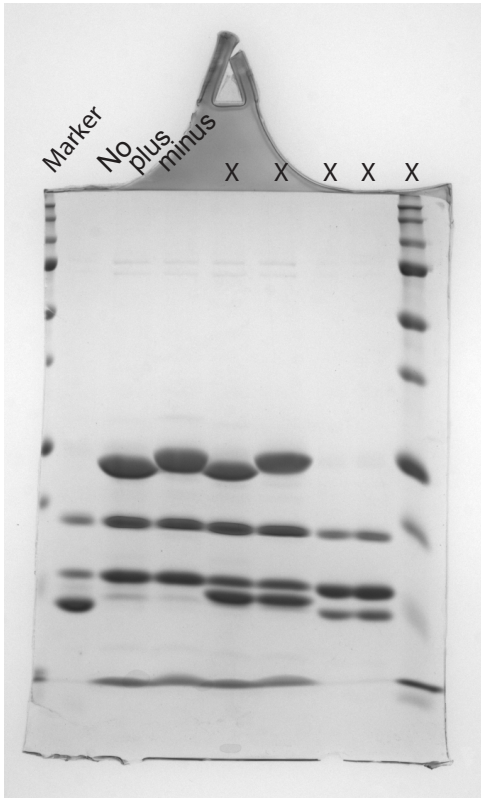

Raw image for S1B\_Fig, Coomassie stained, image captured by Bio-Rad ChemiDoc Touch

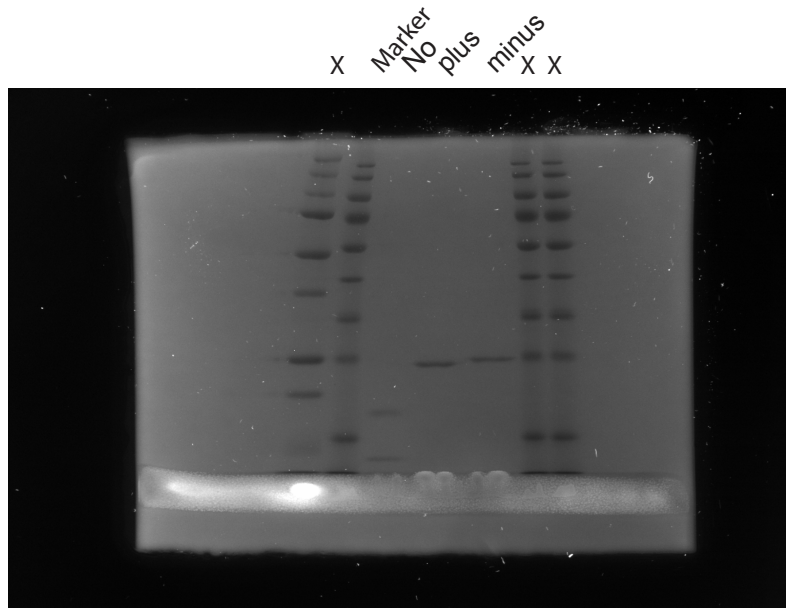

Raw image for S1C\_Fig, Bia-Rad TGX Stain-Free gel, image captured by Bia-Rad Geldoc.

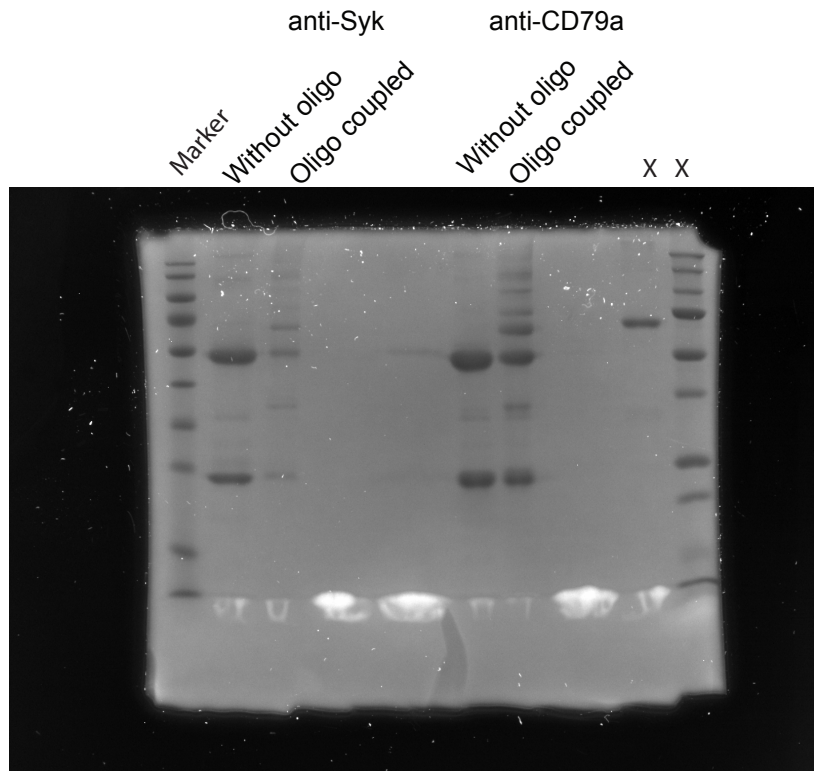

Raw image for S5\_Fig, Bia-Rad TGX Stain-Free gel, image captured by Bia-Rad Geldoc.
